# Supplementary material for: Mixed layer depth variability in the Red Sea
Source: Copernicus journal article supplement (doi:10.5194/os-2018-6), 2018-02-16
Supplement: Supplementary file 1 [file os-2018-6-supplement.pdf]

Supporting Information for

## **Mixed layer depth variability in the Red Sea**

Cheriyeri P. Abdulla<sup>1\*</sup>, Mohammed A. Alsaafani<sup>1, 2</sup>, Turki M. Alraddadi<sup>1</sup>, and Alaa M. Albarakati<sup>1</sup>

<sup>1</sup>Department of Marine Physics, Faculty of Marine Sciences, King Abdulaziz University, Jeddah, Saudi Arabia.

<sup>2</sup>Department of Earth & Environmental Sciences, Faculty of Science, Sana'a University, Yemen.

*Correspondence to:* Cheriyeri P. Abdulla (acp@stu.kau.edu.sa)

## **Contents of this file**

1. Figure S1
2. Tables S1
3. Tables S2
4. Tables S3
5. Tables S4

## **Introduction**

The figures and tables which support the results discussed in the manuscript “**Mixed layer depth variability in the Red Sea**” are given below. Detailed description on the attached figures and tables is given in the manuscript. A brief summary is given in the following lines.

Figure S1 shows the monthly spread of the temperature profiles along the main-axis of Red Sea. The number of profiles are marked at the top right corner in each sub-figure. This document also includes tables of number of profiles removed at different steps of quality checking procedure and the number of selected profiles along the main-axis of Red Sea based on the month and year of measurement. Similarly, a table is included to show the number of profiles with salinity values in the study area.

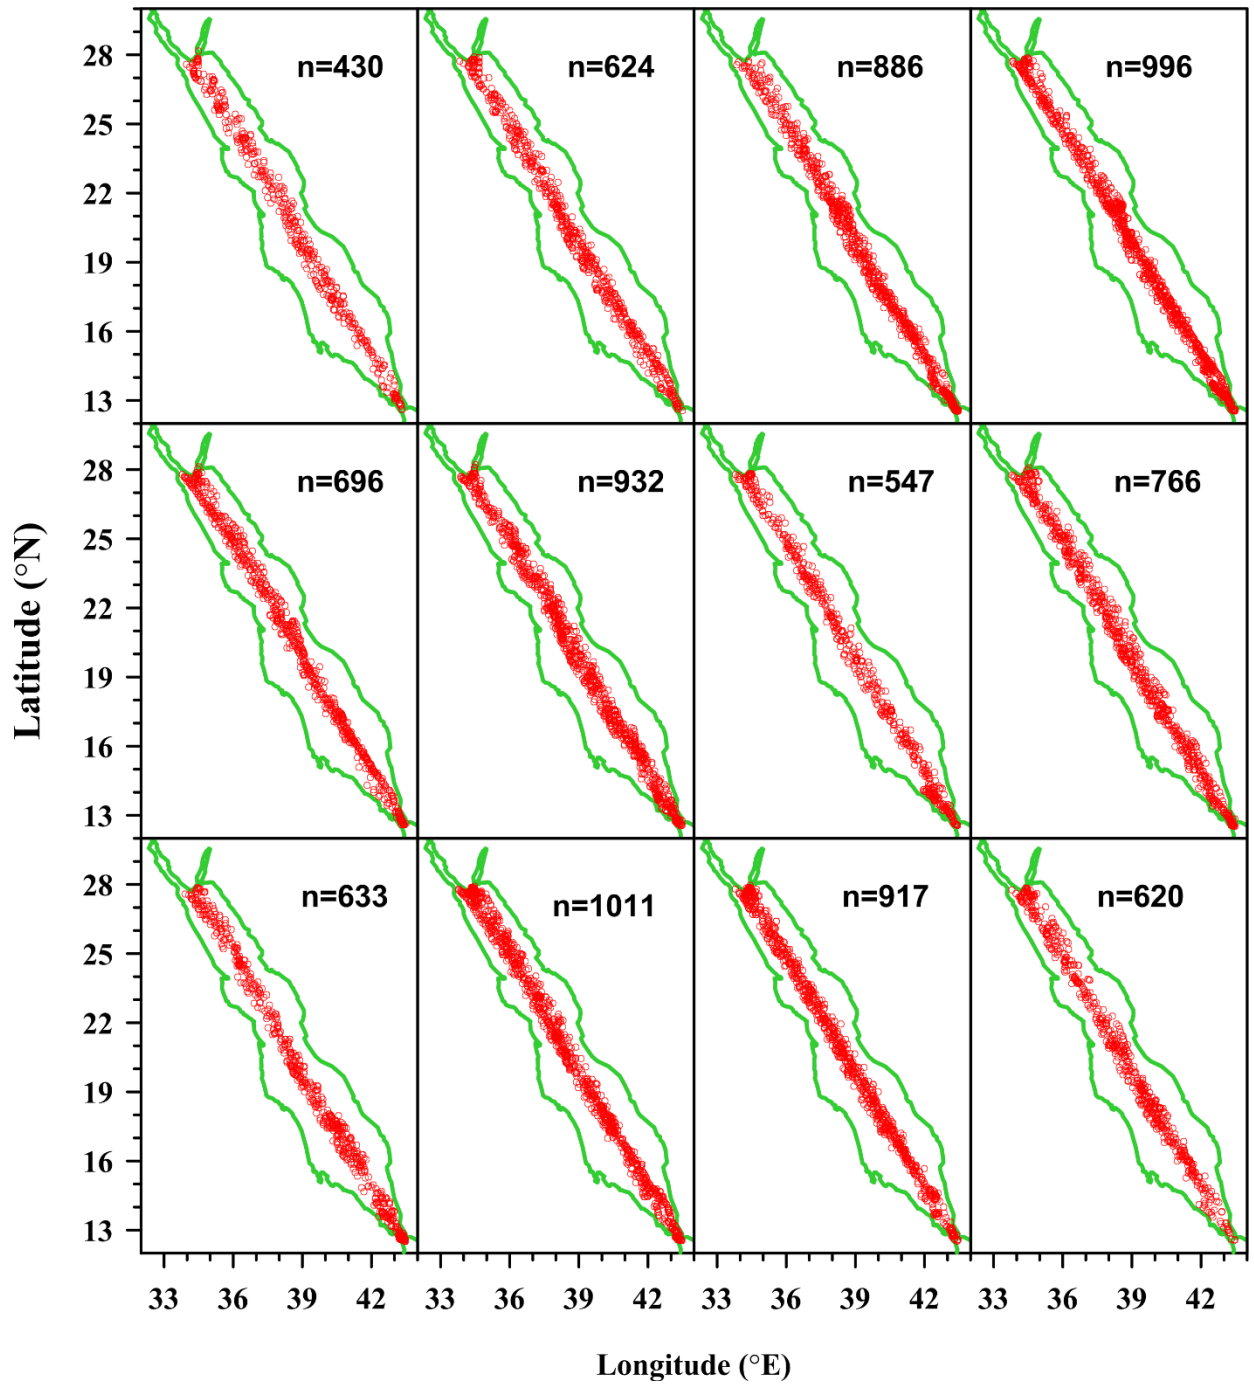

**Figure S1.** Monthly spread of the temperature profiles along the main-axis of Red Sea. The number of profiles are marker at the top right corner. The different steps of quality control are discussed in the main manuscript.

**Table S1.** Number of temperature profiles removed at different steps of quality check.

| Quality Check                                               | Type |      |      |      | Total |
|-------------------------------------------------------------|------|------|------|------|-------|
|                                                             | CTD  | PFL  | XBT  | MBT  |       |
| Before the quality check                                    | 936  | 2216 | 6793 | 3946 | 13891 |
| Bad positioned profiles                                     | 2    | 35   | 20   | 33   | 90    |
| Duplicate profiles                                          | 213  | 781  | 342  | 90   | 1426  |
| Removed during depth duplication and depth inversion check* | 0    | 0    | 3    | 4    | 7     |
| Removed during large range check*                           | 0    | 1    | 5    | 4    | 10    |
| Removed during large temperature inversion/gradient check*  | 31   | 14   | 63   | 26   | 134   |
| Low resolution profiles (res >25m)                          | 0    | 0    | 853  | 159  | 1012  |
| Profiles accepted after quality check                       | 690  | 1385 | 5507 | 3630 | 11212 |

\*Instead of rejecting the entire profile, the particular level/s with “out of range value/s” or “inversion/gradient in temperature” is/are removed from the profile. If multiple inversions are present in a single profile (3 or more), then the complete profile is rejected.

**Table S2.** Number of temperature profiles along the main-axis of Red Sea based on the year of measurement.

| Years     | Type |     |      |      | Total |
|-----------|------|-----|------|------|-------|
|           | CTD  | PFL | XBT  | MBT  |       |
| <1970     | 0    | 0   | 107  | 2735 | 2842  |
| 1971-1980 | 11   | 0   | 938  | 56   | 1005  |
| 1981-1990 | 172  | 0   | 1396 | 171  | 1739  |
| 1990-2000 | 128  | 24  | 1640 | 0    | 1792  |
| >2000     | 161  | 692 | 827  | 0    | 1680  |

**Table S3.** Number of temperature profiles along the main-axis of Red Sea in different months.

| Months | Type |     |      |      | Total |
|--------|------|-----|------|------|-------|
|        | CTD  | PFL | XBT  | MBT  |       |
| Jan    | 1    | 57  | 293  | 79   | 430   |
| Feb    | 85   | 40  | 312  | 187  | 624   |
| Mar    | 70   | 25  | 603  | 188  | 886   |
| Apr    | 23   | 46  | 406  | 521  | 996   |
| May    | 37   | 48  | 221  | 390  | 696   |
| Jun    | 40   | 43  | 442  | 407  | 932   |
| Jul    | 43   | 49  | 295  | 160  | 547   |
| Aug    | 62   | 59  | 488  | 157  | 766   |
| Sep    | 20   | 63  | 462  | 88   | 633   |
| Oct    | 62   | 96  | 586  | 267  | 1011  |
| Nov    | 19   | 94  | 451  | 353  | 917   |
| Dec    | 10   | 96  | 349  | 165  | 620   |
| Total  | 472  | 716 | 4908 | 2962 | 9058  |

**Table S4.** Number of total salinity profiles available in the entire Red Sea based on the year of measurement.

| Years     | Type |      |     |     | Total |
|-----------|------|------|-----|-----|-------|
|           | CTD  | PFL  | XBT | MBT |       |
| <1970     | 0    | 0    | 0   | 0   | 0     |
| 1971-1980 | 12   | 0    | 0   | 0   | 12    |
| 1981-1990 | 202  | 0    | 0   | 0   | 202   |
| 1990-2000 | 134  | 37   | 0   | 0   | 171   |
| >2000     | 341  | 1337 | 0   | 0   | 1678  |
| Total     | 689  | 1374 | 0   | 0   | 2063  |

\* Some of the CTD and PFL profiles does not recorded the salinity.
