# Supplementary material for: Mixed layer depth variability in the Red Sea
Source: Copernicus journal article supplement (doi:10.5194/os-2018-6), 2018-02-16
Supplement: Supplementary file [file os-2018-6-AC3-supplement.pdf]

1 Supporting Information for

2 **Mixed layer depth variability in the Red Sea**

3 Cheriyei P. Abdulla<sup>1\*</sup>, Mohammed A. Alsaafani<sup>1,2</sup>, Turki M. Alraddadi<sup>1</sup>, and Alaa M. Albarakati<sup>1</sup>

4 <sup>1</sup>Department of Marine Physics, Faculty of Marine Sciences, King Abdulaziz University, Jeddah, Saudi Arabia.

5 <sup>2</sup>Department of Earth & Environmental Sciences, Faculty of Science, Sana'a University, Yemen.

6  
7 *Correspondence to:* Cheriyei P. Abdulla ([acp@stu.kau.edu.sa](mailto:acp@stu.kau.edu.sa))

8

9

10 **Contents of this file**

11 [1. Figure S1](#)

12 [2. Figure S2](#)

13 [3. Figure S3](#)

14 [4. Figure S4](#)

15

16

17

**Deleted:** <#>Figure S1¶  
<#>Tables S1¶  
<#>Tables S2¶  
<#>Tables S3¶  
<#>Tables S4¶

23 **Introduction**

24 The figures and tables which support the results discussed in the manuscript “**Mixed layer depth**  
25 **variability in the Red Sea**” are given below. Detailed description on the attached figures and tables is  
26 given in the manuscript. A brief summary is given in the following lines.

27 Figure S1 shows the monthly distribution of the temperature profiles along the main-axis of Red Sea. The  
28 number of profiles are marked at the top right corner in each sub-figure. This document also includes bar  
29 charts showing the number of selected profiles along the main-axis of Red Sea based on the year (Fig.  
30 S2) and month (Fig. S3) of measurement. Similarly, a bar chart is included to show the number of profiles  
31 with salinity values in the study area (Fig. S4).

**Deleted:** Figure S1 shows the monthly distribution of the temperature profiles along the main-axis of Red Sea. The number of profiles are marked at the top right corner in each sub-figure. This document also includes tables of number of profiles removed at different steps of quality checking procedure and the number of selected profiles along the main-axis of Red Sea based on the month and year of measurement. Similarly, a table is included to show the number of profiles with salinity values in the study area. ¶

32  
33  
34

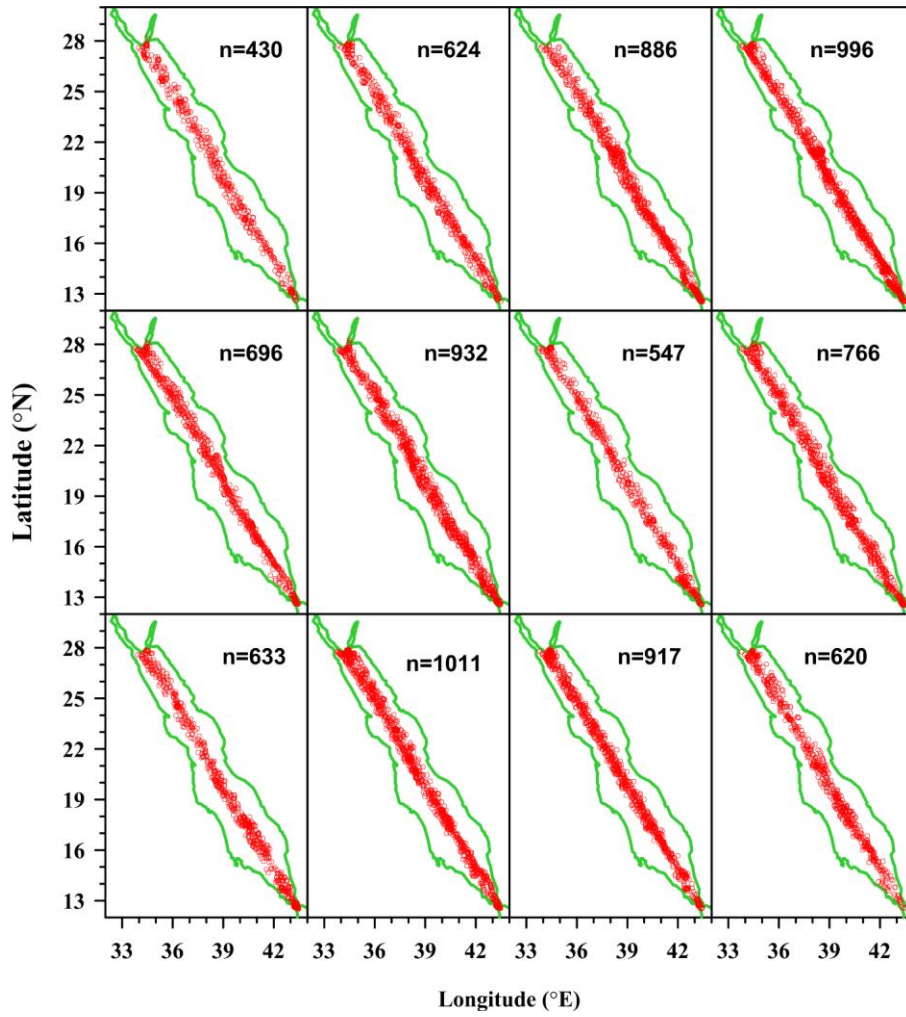

45 **Figure S1.** Monthly distribution of the temperature profiles along the main-axis of Red Sea. The number  
46 of profiles is marked at the top right corner. The different steps of quality control are discussed in the  
47 main manuscript.

Deleted: are  
Deleted: r

48  
49  
50  
51

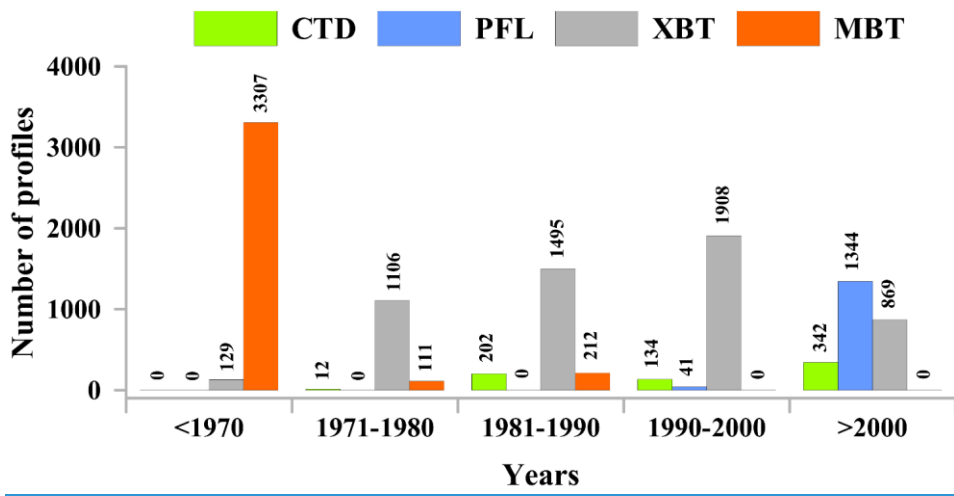

52  
53

54 **Figure S2.** Number of temperature profiles along the main-axis of Red Sea based on the year of  
55 measurement.

56  
57  
58

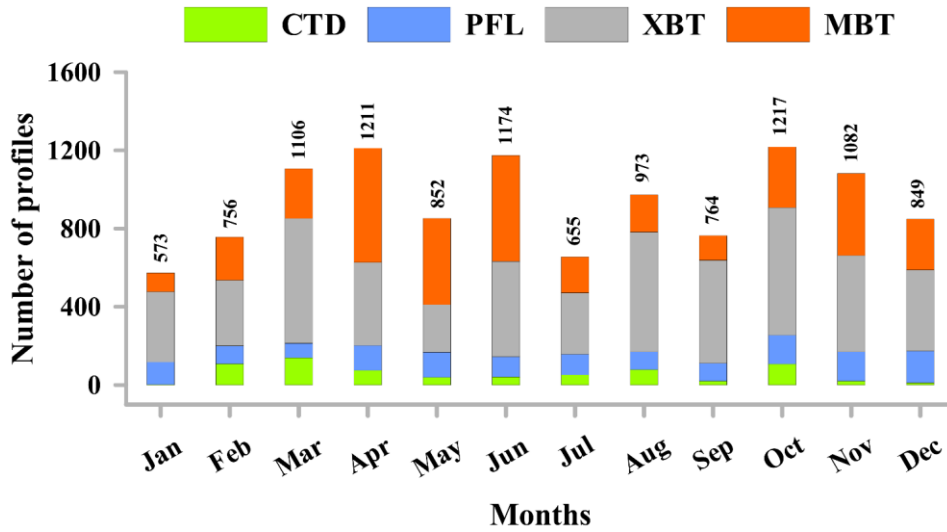

61  
62

63 **Figure S3.** Number of temperature profiles along the main-axis of Red Sea based on the month of  
64 measurement.

65  
66  
67  
68  
69

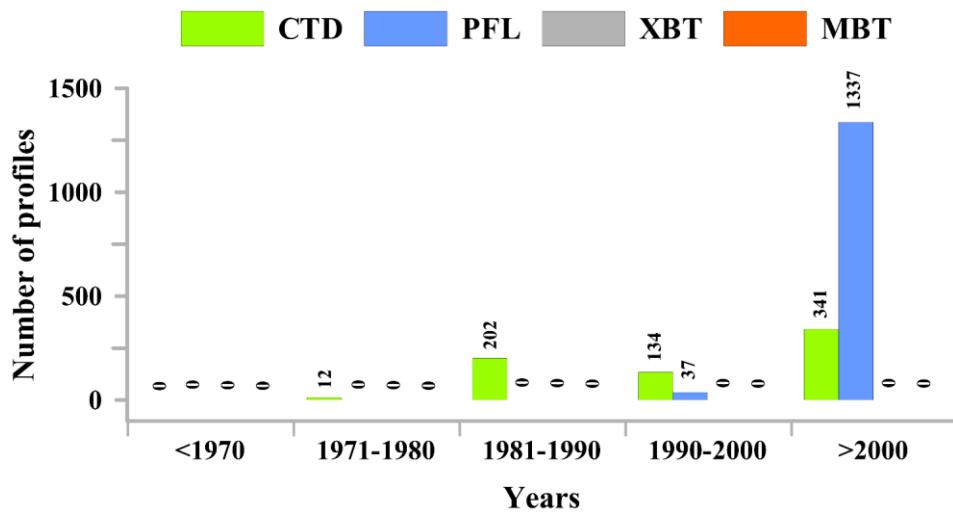

71 **Figure S4.** Number of total salinity profiles available in the entire Red Sea based on the year of  
 72 measurement.

73
